# Supplementary material for: Hand Washing Practices Among Emergency Medical Services Providers
Source: PubMed Central journal article supplement (PMC4644042; doi:10.5811/westjem.2015.7.25917), 2015-10-20
Supplement: wjem-16-727-g001.pdf [file wjem-16-727-g001.pdf]

| Variable                            | Responses              |                 |                  |                         |                   | Mean (SD) |
|-------------------------------------|------------------------|-----------------|------------------|-------------------------|-------------------|-----------|
|                                     | Male                   | Female          |                  |                         |                   |           |
| <b>Gender</b>                       | 1073 (72%)             | 421 (28%)       |                  |                         |                   |           |
|                                     | <b>18 – 29</b>         | <b>30 – 39</b>  | <b>40 – 49</b>   | <b>50 – 59</b>          | <b>60+</b>        |           |
| <b>Age</b>                          | 416 (28%)              | 360 (24%)       | 367 (25%)        | 249 (17%)               | 104 (7%)          |           |
|                                     | <b>First Responder</b> | <b>EMT</b>      | <b>AEMT</b>      | <b>Paramedic</b>        | <b>Physician</b>  |           |
| <b>Training</b>                     | 41 (3%)                | 667 (45%)       | 64 (4%)          | 705 (47%)               | 16 (1%)           |           |
|                                     | <b>Volunteer</b>       | <b>Paid</b>     | <b>Both</b>      |                         |                   |           |
| <b>Paid/Volunteer</b>               | 386 (26%)              | 810 (56%)       | 272 (18%)        |                         |                   |           |
|                                     | <b>1 – 5</b>           | <b>6 – 10</b>   | <b>10 – 19</b>   | <b>20 – 29</b>          | <b>30+</b>        |           |
| <b>Years of Experience</b>          | 366 (25%)              | 256 (17%)       | 447 (30%)        | 276 (18%)               | 155 (10%)         |           |
|                                     | <b>Once</b>            | <b>Multiple</b> | <b>Never</b>     |                         |                   |           |
| <b>BBP Training</b>                 | 129 (9%)               | 1336 (89%)      | 26 (2%)          |                         |                   |           |
|                                     | <b>Once</b>            | <b>Multiple</b> | <b>Never</b>     |                         |                   |           |
| <b>BSI Training</b>                 | 106 (7%)               | 1370 (92%)      | 14 (1%)          |                         |                   |           |
|                                     | <b>Yes</b>             | <b>No</b>       |                  |                         |                   |           |
| <b>Sanitizer in ambulance</b>       | 1387 (94%)             | 95 (6%)         |                  |                         |                   |           |
|                                     | <b>Yes</b>             | <b>No</b>       |                  |                         |                   |           |
| <b>Sanitizer in station</b>         | 1365 (92%)             | 126 (8%)        |                  |                         |                   |           |
|                                     | <b>Yes</b>             | <b>No</b>       |                  |                         |                   |           |
| <b>Brings own Sanitizer</b>         | 380 (25%)              | 1113 (75%)      |                  |                         |                   |           |
|                                     | <b>Never</b>           | <b>Rarely</b>   | <b>Sometimes</b> | <b>Most of the time</b> | <b>Every time</b> |           |
| <b>Cleans before patient</b>        | 175 (12%)              | 394 (26%)       | 343 (23%)        | 394 (26%)               | 190 (13%)         | 3.0 (1.2) |
| <b>Cleans after skin contact</b>    | 21 (1%)                | 66 (4%)         | 165 (11%)        | 430 (29%)               | 813 (54%)         | 4.3 (0.9) |
| <b>Cleans when contact finishes</b> | 2 (<1%)                | 6 (<1%)         | 76 (5%)          | 412 (28%)               | 997 (67%)         | 4.6 (0.6) |
| <b>Uses gloves</b>                  | 1 (<1%)                | 16 (1%)         | 167 (11%)        | 522 (35%)               | 779 (52%)         | 4.4 (0.7) |
| <b>Uses gloves with equipment</b>   | 40 (3%)                | 252 (17%)       | 579 (39%)        | 454 (31%)               | 159 (11%)         | 3.3 (1.0) |
| <b>Cleans after using equipment</b> | 28 (2%)                | 199 (13%)       | 435 (24%)        | 492 (33%)               | 332 (22%)         | 3.6 (1.0) |
| <b>Cleans after driving</b>         | 134 (9%)               | 341 (23%)       | 397 (27%)        | 329 (22%)               | 264 (18%)         | 3.2 (1.2) |

|                                                |             |                  |                           |           |           |           |
|------------------------------------------------|-------------|------------------|---------------------------|-----------|-----------|-----------|
| <b>Cleans after invasive procedures</b>        | 228 (16%)   | 273 (19%)        | 227 (16%)                 | 218 (16%) | 456 (33%) | 3.3 (1.5) |
| <b>Cleans stethoscope</b>                      | 99 (7%)     | 223 (16%)        | 490 (34%)                 | 426 (30%) | 186 (13%) | 3.3 (1.1) |
|                                                | <b>Soap</b> | <b>Sanitizer</b> | <b>Do not clean after</b> |           |           |           |
| <b>Cleans after hands visibly contaminated</b> | 1258 (84%)  | 239 (16%)        |                           |           |           |           |
|                                                | <b>Soap</b> | <b>Sanitizer</b> | <b>No preference</b>      |           |           |           |
| <b>Soap or Sanitizer preference</b>            | 1059 (71%)  | 255 (17%)        | 185 (12%)                 |           |           |           |
|                                                | <b>Yes</b>  | <b>No</b>        | <b>I don't know</b>       |           |           |           |
| <b>Must use soap with GI illness</b>           | 839 (56%)   | 534 (36%)        | 124 (8%)                  |           |           |           |
