# Supplementary material for: Hand Washing Practices Among Emergency Medical Services Providers
Source: PubMed Central journal article supplement (PMC4644042; doi:10.5811/westjem.2015.7.25917), 2015-10-20
Supplement: wjem-16-727-g002.pdf [file wjem-16-727-g002.pdf]

| Responder Characteristic  |                 | Response                      |                               |                               |                               |                               |                               |                               |
|---------------------------|-----------------|-------------------------------|-------------------------------|-------------------------------|-------------------------------|-------------------------------|-------------------------------|-------------------------------|
|                           |                 | Clean before Contact          | Clean after Skin              | Clean after over              | Gloves                        | Gloves supplies               | Clean after equipment         | Clean Driving                 |
| Gender                    | Male            | 2.9 (1.2)<br>2.9, 3.0<br>1071 | 4.3 (0.9)<br>4.2, 4.3<br>1071 | 4.6 (0.6)<br>4.5, 4.6<br>1068 | 4.4 (0.8)<br>4.3, 4.4<br>1064 | 3.3 (1.0)<br>3.2, 3.3<br>1064 | 3.6 (1.0)<br>3.5, 3.6<br>1065 | 3.1 (1.2)<br>3.0, 3.2<br>1060 |
|                           | Female          | 3.2 (1.2)<br>3.1, 3.3<br>419  | 4.4 (0.9)<br>4.3, 4.5<br>418  | 4.7 (0.5)<br>4.7, 4.8<br>419  | 4.4 (0.7)<br>4.4, 4.5<br>415  | 3.4 (0.9)<br>3.3, 3.5<br>415  | 3.7 (1.1)<br>3.6, 3.8<br>415  | 3.3 (1.3)<br>3.2, 3.4<br>399  |
| <i>MANOVA p&lt;0.0001</i> |                 | <i>&lt;0.0001</i>             | <i>0.0038</i>                 | <i>&lt;0.0001</i>             | <i>0.29</i>                   | <i>0.052</i>                  | <i>0.22</i>                   | <i>0.0057</i>                 |
| Age                       | 18-29           | 2.9 (1.1)<br>2.8, 3.0<br>416  | 4.3 (0.9)<br>4.2, 4.4<br>416  | 4.5 (0.7)<br>4.4, 4.6<br>415  | 4.4 (0.7)<br>4.3, 4.5<br>411  | 3.3 (1.0)<br>3.2, 3.4<br>413  | 3.4 (1.1)<br>3.3, 3.5<br>414  | 2.8 (1.2)<br>2.7, 2.9<br>401  |
|                           | 30-39           | 2.9 (1.3)<br>2.8, 3.0<br>360  | 4.3 (0.9)<br>4.2, 4.4<br>360  | 4.6 (0.6)<br>4.5, 4.6<br>358  | 4.4 (0.7)<br>4.3, 4.5<br>357  | 3.3 (0.9)<br>3.3, 3.4<br>358  | 3.7 (1.0)<br>3.6, 3.8<br>356  | 3.2 (1.2)<br>3.1, 3.3<br>357  |
|                           | 40-49           | 3.1 (1.2)<br>2.9, 3.2<br>365  | 4.3 (1.0)<br>4.2, 4.4<br>366  | 4.7 (0.6)<br>4.6, 4.7<br>364  | 4.4 (0.7)<br>4.3, 4.5<br>364  | 3.3 (0.9)<br>3.2, 3.4<br>362  | 3.7 (1.0)<br>3.6, 3.8<br>364  | 3.3 (1.1)<br>3.2, 3.5<br>364  |
|                           | 50-59           | 3.2 (1.2)<br>3.1, 3.4<br>247  | 4.4 (1.0)<br>4.2, 4.5<br>245  | 4.7 (0.6)<br>4.6, 4.8<br>248  | 4.4 (0.7)<br>4.3, 4.5<br>246  | 3.3 (1.0)<br>3.2, 3.4<br>247  | 3.7 (1.1)<br>3.6, 3.8<br>246  | 3.3 (1.2)<br>3.2, 3.5<br>242  |
|                           | 60+             | 3.4 (1.3)<br>3.1, 3.6<br>104  | 4.4 (0.9)<br>4.2, 4.6<br>104  | 4.7 (0.5)<br>4.6, 4.8<br>104  | 4.3 (0.7)<br>4.2, 4.5<br>103  | 3.1 (1.0)<br>2.9, 3.3<br>100  | 3.5 (1.0)<br>3.3, 3.7<br>102  | 3.5 (1.0)<br>3.2, 3.7<br>98   |
| <i>MANOVA p&lt;0.0001</i> |                 | <i>&lt;0.0001</i>             | <i>0.47</i>                   | <i>&lt;0.0001</i>             | <i>0.73</i>                   | <i>0.091</i>                  | <i>&lt;0.0001</i>             | <i>&lt;0.0001</i>             |
| Training                  | First Responder | 3.2 (1.2)<br>2.8, 3.6<br>41   | 4.6 (0.8)<br>4.3, 4.8<br>41   | 4.7 (0.6)<br>4.5, 4.9<br>41   | 4.6 (0.6)<br>4.4, 4.8<br>40   | 3.6 (1.1)<br>3.2, 3.9<br>41   | 3.9 (1.0)<br>3.6, 4.2<br>40   | 3.3 (1.5)<br>2.8, 3.7<br>40   |
|                           | EMT             | 3.0 (1.2)<br>2.9, 3.1<br>665  | 4.3 (0.9)<br>4.3, 4.4<br>664  | 4.6 (0.6)<br>4.6, 4.7<br>664  | 4.4 (0.7)<br>4.3, 4.5<br>662  | 3.3 (1.0)<br>3.2, 3.4<br>658  | 3.5 (1.1)<br>3.4, 3.6<br>661  | 3.2 (1.2)<br>3.1, 3.3<br>641  |
|                           | AEMT            | 3.6 (1.3)<br>3.3, 3.9<br>64   | 4.5 (0.9)<br>4.2, 4.7<br>64   | 4.7 (0.6)<br>4.5, 4.8<br>64   | 4.6 (0.6)<br>4.4, 4.7<br>63   | 3.5 (0.9)<br>3.3, 3.8<br>64   | 4.1 (0.9)<br>3.9, 4.3<br>62   | 3.5 (1.3)<br>3.1, 3.8<br>63   |
|                           | Paramedic       | 3.0 (1.2)<br>2.9, 3.1<br>704  | 4.2 (0.9)<br>4.2, 4.3<br>704  | 4.6 (0.6)<br>4.5, 4.6<br>702  | 4.4 (0.8)<br>4.3, 4.4<br>699  | 3.3 (0.9)<br>3.2, 3.3<br>700  | 3.7 (1.0)<br>3.6, 3.7<br>701  | 3.1 (1.2)<br>3.1, 3.2<br>700  |
|                           | Physician       | 4.1 (1.0)<br>3.5, 4.6<br>15   | 4.3 (0.8)<br>3.8, 4.7<br>15   | 4.7 (0.6)<br>4.3, 5.0<br>15   | 4.1 (1.0)<br>3.5, 4.6<br>15   | 3.4 (1.0)<br>2.8, 3.9<br>14   | 3.8 (1.1)<br>3.2, 4.4<br>15   | 3.1 (1.3)<br>2.3, 3.8<br>14   |
| <i>MANOVA p&lt;0.0001</i> |                 | <i>&lt;0.0001</i>             | <i>0.078</i>                  | <i>0.50</i>                   | <i>0.019</i>                  | <i>0.087</i>                  | <i>&lt;0.0001</i>             | <i>0.39</i>                   |
| Status                    | Volunteer       | 3.1 (1.2)<br>2.9, 3.2<br>386  | 4.3 (0.9)<br>4.2, 4.4<br>384  | 4.7 (0.6)<br>4.6, 4.7<br>383  | 4.3 (0.7)<br>4.3, 4.4<br>380  | 3.3 (1.0)<br>3.2, 3.4<br>379  | 3.4 (1.1)<br>3.3, 3.5<br>380  | 3.1 (1.3)<br>3.0, 3.3<br>360  |
|                           | Paid            | 3.0 (1.3)<br>2.9, 3.1<br>816  | 4.3 (0.9)<br>4.2, 4.4<br>817  | 4.6 (0.6)<br>4.5, 4.6<br>816  | 4.4 (0.7)<br>4.4, 4.5<br>812  | 3.3 (0.9)<br>3.3, 3.4<br>813  | 3.7 (1.0)<br>3.6, 3.8<br>817  | 3.2 (1.2)<br>3.1, 3.3<br>812  |
|                           | Both            | 3.1 (1.1)<br>2.9, 3.2<br>271  | 4.2 (0.9)<br>4.1, 4.3<br>271  | 4.6 (0.6)<br>4.5, 4.6<br>271  | 4.3 (0.8)<br>4.2, 4.4<br>270  | 3.2 (0.9)<br>3.1, 3.3<br>270  | 3.5 (1.0)<br>3.4, 3.6<br>266  | 3.1 (1.2)<br>3.0, 3.3<br>270  |
| <i>MANOVA p&lt;0.0001</i> |                 | <i>0.32</i>                   | <i>0.35</i>                   | <i>0.15</i>                   | <i>0.042</i>                  | <i>0.22</i>                   | <i>&lt;0.0001</i>             | <i>0.81</i>                   |
| Years Experience          | 1-5             | 3.0 (1.2)<br>2.9, 3.2<br>364  | 4.4 (0.9)<br>4.3, 4.5<br>365  | 4.5 (0.7)<br>4.5, 4.6<br>365  | 4.6 (0.6)<br>4.5, 4.6<br>362  | 3.5 (1.0)<br>3.4, 3.6<br>362  | 3.5 (1.1)<br>3.4, 3.6<br>363  | 3.0 (1.3)<br>2.9, 3.2<br>346  |
|                           | 6-10            | 2.9 (1.2)<br>2.8, 3.1<br>255  | 4.2 (0.9)<br>4.1, 4.3<br>256  | 4.5 (0.6)<br>4.5, 4.6<br>255  | 4.4 (0.7)<br>4.4, 4.5<br>254  | 3.3 (1.0)<br>3.2, 3.4<br>255  | 3.5 (1.0)<br>3.4, 3.6<br>255  | 3.1 (1.2)<br>2.9, 3.2<br>251  |
|                           | 10-19           | 2.9 (1.2)<br>2.8, 3.0         | 4.2 (1.0)<br>4.1, 4.3         | 4.6 (0.6)<br>4.6, 4.7         | 4.3 (0.7)<br>4.3, 4.4         | 3.3 (0.9)<br>3.2, 3.3         | 3.7 (1.0)<br>3.6, 3.8         | 3.2 (1.2)<br>3.1, 3.3         |

|                     |                           |                               |                               |                               |                               |                               |                               |                               |
|---------------------|---------------------------|-------------------------------|-------------------------------|-------------------------------|-------------------------------|-------------------------------|-------------------------------|-------------------------------|
|                     |                           | 447                           | 444                           | 446                           | 442                           | 442                           | 440                           | 441                           |
|                     | 20-29                     | 3.1 (1.2)<br>3.0, 3.2<br>275  | 4.3 (0.9)<br>4.2, 4.4<br>275  | 4.6 (0.6)<br>4.6, 4.7<br>273  | 4.2 (0.8)<br>4.1, 4.3<br>273  | 3.2 (0.9)<br>3.1, 3.3<br>275  | 3.6 (1.0)<br>3.5, 3.7<br>273  | 3.3 (1.1)<br>3.1, 3.4<br>274  |
|                     | 30+                       | 3.3 (1.2)<br>3.1, 3.5<br>155  | 4.3 (1.0)<br>4.2, 4.5<br>155  | 4.7 (0.5)<br>4.6, 4.8<br>154  | 4.3 (0.7)<br>4.2, 4.4<br>154  | 3.2 (1.1)<br>3.0, 3.3<br>150  | 3.6 (1.1)<br>3.5, 3.8<br>155  | 3.3 (1.3)<br>3.1, 3.5<br>153  |
|                     | <i>MANOVA p&lt;0.0001</i> | <i>0.0025</i>                 | <i>0.053</i>                  | <i>0.0078</i>                 | <i>&lt;0.0001</i>             | <i>0.0004</i>                 | <i>0.016</i>                  | <i>0.013</i>                  |
| Hygiene Training    | Yes, once                 | 2.7 (1.3)<br>2.5, 2.9<br>129  | 4.3 (0.9)<br>4.2, 4.5<br>129  | 4.5 (0.7)<br>4.4, 4.7<br>129  | 4.4 (0.7)<br>4.3, 4.6<br>127  | 3.3 (1.0)<br>3.1, 3.5<br>126  | 3.4 (1.12)<br>3.2, 3.6<br>128 | 3.0 (1.3)<br>2.8, 3.3<br>120  |
|                     | Yes, multiple times       | 3.1 (1.2)<br>3.0, 3.1<br>1333 | 4.3 (0.9)<br>4.2, 4.3<br>1331 | 4.6 (0.6)<br>4.6, 4.6<br>1329 | 4.4 (0.7)<br>4.3, 4.4<br>1324 | 3.3 (1.0)<br>3.2, 3.3<br>1325 | 3.6 (1.0)<br>3.6, 3.7<br>1324 | 3.2 (1.2)<br>3.1, 3.3<br>1313 |
|                     | No                        | 2.7 (1.3)<br>2.2, 3.2<br>26   | 4.6 (0.6)<br>4.3, 4.8<br>26   | 4.3 (0.8)<br>4.0, 4.7<br>26   | 4.5 (0.6)<br>4.2, 4.7<br>26   | 3.3 (0.8)<br>2.9, 3.6<br>25   | 3.2 (1.1)<br>2.8, 3.6<br>25   | 2.9 (1.4)<br>2.3, 3.5<br>24   |
|                     | <i>MANOVA p&lt;0.0001</i> | <i>0.0064</i>                 | <i>0.27</i>                   | <i>0.043</i>                  | <i>0.55</i>                   | <i>0.97</i>                   | <i>0.014</i>                  | <i>0.18</i>                   |
| BSI training        | Yes, once                 | 2.6 (1.2)<br>2.3, 2.8<br>106  | 4.3 (1.0)<br>4.1, 4.5<br>106  | 4.5 (0.7)<br>4.4, 4.6<br>106  | 4.5 (0.7)<br>4.3, 4.6<br>103  | 3.2 (1.0)<br>3.0, 3.4<br>105  | 3.3 (1.1)<br>3.1, 3.5<br>105  | 3.0 (1.4)<br>2.7, 3.3<br>98   |
|                     | Yes, multiple times       | 3.1 (1.2)<br>3.0, 3.1<br>1366 | 4.3 (0.9)<br>4.3, 4.4<br>1365 | 4.6 (0.6)<br>4.6, 4.7<br>1363 | 4.4 (0.7)<br>4.3, 4.4<br>1355 | 3.3 (1.0)<br>3.3, 3.4<br>1355 | 3.6 (1.0)<br>3.6, 3.7<br>1358 | 3.2 (1.2)<br>3.1, 3.3<br>1343 |
|                     | No                        | 2.9 (1.3)<br>2.1, 3.6<br>14   | 4.3 (0.7)<br>3.9, 4.7<br>14   | 4.1 (0.9)<br>3.6, 4.7<br>14   | 4.4 (0.6)<br>4.1, 4.8<br>14   | 3.2 (1.1)<br>2.6, 3.8<br>14   | 3.1 (1.3)<br>2.3, 3.8<br>14   | 2.6 (1.5)<br>1.8, 3.5<br>14   |
|                     | <i>MANOVA p&lt;0.0001</i> | <i>0.0004</i>                 | <i>0.99</i>                   | <i>0.0017</i>                 | <i>0.53</i>                   | <i>0.58</i>                   | <i>0.0004</i>                 | <i>0.097</i>                  |
| Soap in ambulance   | Yes                       | 3.0 (1.2)<br>3.0, 3.1<br>1385 | 4.3 (0.9)<br>4.3, 4.4<br>1383 | 4.6 (0.6)<br>4.6, 4.6<br>1381 | 4.4 (0.7)<br>4.4, 4.4<br>1376 | 3.3 (1.0)<br>3.2, 3.3<br>1375 | 3.6 (1.0)<br>3.6, 3.7<br>1374 | 3.2 (1.2)<br>3.1, 3.2<br>1357 |
|                     | No                        | 2.9 (1.2)<br>2.7, 3.2<br>95   | 4.1 (1.1)<br>3.9, 4.4<br>95   | 4.5 (0.7)<br>4.3, 4.6<br>95   | 4.4 (0.8)<br>4.2, 4.5<br>93   | 3.2 (1.1)<br>3.0, 3.4<br>94   | 3.5 (1.2)<br>3.3, 3.8<br>95   | 3.0 (1.2)<br>2.7, 3.2<br>94   |
|                     | <i>MANOVA p=0.19</i>      | <i>0.41</i>                   | <i>0.076</i>                  | <i>0.014</i>                  | <i>0.87</i>                   | <i>0.42</i>                   | <i>0.58</i>                   | <i>0.090</i>                  |
| Soap in bay/station | Yes                       | 3.1 (1.2)<br>3.0, 3.1<br>1362 | 4.3 (0.9)<br>4.3, 4.4<br>1361 | 4.6 (0.6)<br>4.6, 4.7<br>1360 | 4.4 (0.7)<br>4.4, 4.4<br>1351 | 3.3 (1.0)<br>3.3, 3.4<br>1352 | 3.6 (1.0)<br>3.6, 3.7<br>1354 | 3.2 (1.2)<br>3.1, 3.3<br>1332 |
|                     | No                        | 2.6 (1.2)<br>2.4, 2.8<br>125  | 4.1 (1.1)<br>3.9, 4.3<br>125  | 4.4 (0.7)<br>4.3, 4.6<br>124  | 4.3 (0.7)<br>4.2, 4.5<br>126  | 3.1 (1.0)<br>2.9, 3.3<br>124  | 3.3 (1.1)<br>3.1, 3.5<br>124  | 2.9 (1.2)<br>2.7, 3.1<br>125  |
|                     | <i>MANOVA p=0.0075</i>    | <i>0.0001</i>                 | <i>0.0040</i>                 | <i>0.0009</i>                 | <i>0.38</i>                   | <i>0.043</i>                  | <i>0.0028</i>                 | <i>0.016</i>                  |
| Bring own soap      | Yes                       | 3.5 (1.2)<br>3.4, 3.6<br>350  | 4.4 (0.9)<br>4.4, 4.5<br>379  | 4.8 (0.5)<br>4.7, 4.8<br>379  | 4.4 (0.7)<br>4.3, 4.5<br>377  | 3.4 (1.0)<br>3.3, 3.5<br>376  | 3.8 (1.0)<br>3.7, 3.9<br>376  | 3.4 (1.1)<br>3.3, 3.6<br>374  |
|                     | No                        | 2.9 (1.2)<br>2.8, 2.9<br>1109 | 4.3 (0.9)<br>4.2, 4.3<br>1109 | 4.6 (0.6)<br>4.5, 4.6<br>1107 | 4.4 (0.7)<br>4.3, 4.4<br>1101 | 3.3 (1.0)<br>3.2, 3.3<br>1101 | 3.5 (1.0)<br>3.5, 3.6<br>1103 | 3.1 (1.2)<br>3.0, 3.1<br>1085 |
|                     | <i>MANOVA p&lt;0.0001</i> | <i>&lt;0.0001</i>             | <i>0.0005</i>                 | <i>&lt;0.0001</i>             | <i>0.39</i>                   | <i>0.21</i>                   | <i>&lt;0.0001</i>             | <i>&lt;0.0001</i>             |
